# Supplementary material
Source: HighWire-hosted journal article supplement (https://ard.bmj.com/content/77/10/1413)
Supplement: inline-supplementary-material-3 [file inline-supplementary-material-3.docx]

**Supplementary file 3**

Supplementary table 1: number of rheumatologists completing the questionnaire per country

| **Country** | **Number of questionnaire responders** |
| --- | --- |
| USA | 2 |
| Mexico | 2 |
| South-Africa | 2 |
| Japan | 3 |
| Brazil | 2 |
| United Kingdom | 5 |
| Spain | 10 |
| Italya | 8 |
| Ireland | 3 |
| Portugal | 4 |
| France | 4 |
| India | 3 |
| The Netherlands | 3 |
| Qatarb | 1 |

aSince data from Italy were mainly derived from a biologics register,
data from Italy were excluded from the analyses. bSince only 1 rheumatologist was available to complete the
questionnaire in Qatar, data from Qatar were excluded from
the analyses.
