# Supplementary material
Source: HighWire-hosted journal article supplement (https://ard.bmj.com/content/77/10/1413)
Supplement: inline-supplementary-material-4 [file inline-supplementary-material-4.docx]

**Supplementary file 4**

| Supplementary table 2. Additional patient characteristics per country. | | | | | | |
| --- | --- | --- | --- | --- | --- | --- |
|  | **India** | **South-Africa** | **Brazil** | **Mexico** | **Portugal** | **Spain** |
| Number of patients | 7749 | 670 | 189 | 1191 | 3874 | 123 |
| Gender (female, %) | 84.8 | 81.9 | 87.2 | 89.7 | 81.2 | 83.8 |
| Age at diagnosis (years) | 46.0 (12.0) | 49.1 (13.6) | 45.1 (14.1) | 43.1 (13.6) | 48.2 (14.9) | 49.6 (15.3) |
| BMI | 26.7 (6.8) | 28.5 (6.9) | NA | 29.7 (62.0) | 27.0 (6.1) | 26.0 (4.4) |
| Rheumatoid factor (%) | 82.4 | 96.5 | 80.9 | 74.5 | 72.0 | 84.3 |
| ACPA (%) | 80.4 | 95.5 | NA | 66.2 | 69.0 | 84.9 |
| Smoking (ever, %) | 1.8 | 28.5 | NA | 14.1 | 24.9 | 41.2 |

|  | **France** | **Japan** | **UK** | **Netherlands** | **USA** | **Ireland** |
| --- | --- | --- | --- | --- | --- | --- |
| Number of patients | 161 | 309 | 1291 | 3330 | 803 | 689 |
| Gender (% female) | 74.5 | 81.2 | 77.0 | 69.9 | 77.0 | 66.7 |
| Age at diagnosis (years) | 44.1 (13.2) | 53.3 (15.6) | 54.0 (14.2) | 55.2 (15.0) | 48.4 (15.1) | 43.6 (14.4) |
| BMI | 24.1 (4.4) | 22.7 (3.0) | 28.2 (6.1) | 26.2 (4.6) | 28.7 (6.3) | NA |
| Rheumatoid factor (%) | 77.4 | 96.5 | 72.1 | 65.9 | 57.6 | 57.1 |
| ACPA (%) | 78.0 | 79.7 | 66.9 | 60.3 | 54.7 | 55.9 |
| Smoking (ever, %) | 52.9 | NA | 53.4 | 52.8 | 52.3 | 81.7 |

NA=not available
