# Supplementary material
Source: HighWire-hosted journal article supplement (https://ard.bmj.com/content/77/10/1413)

**Supplementary file 1**


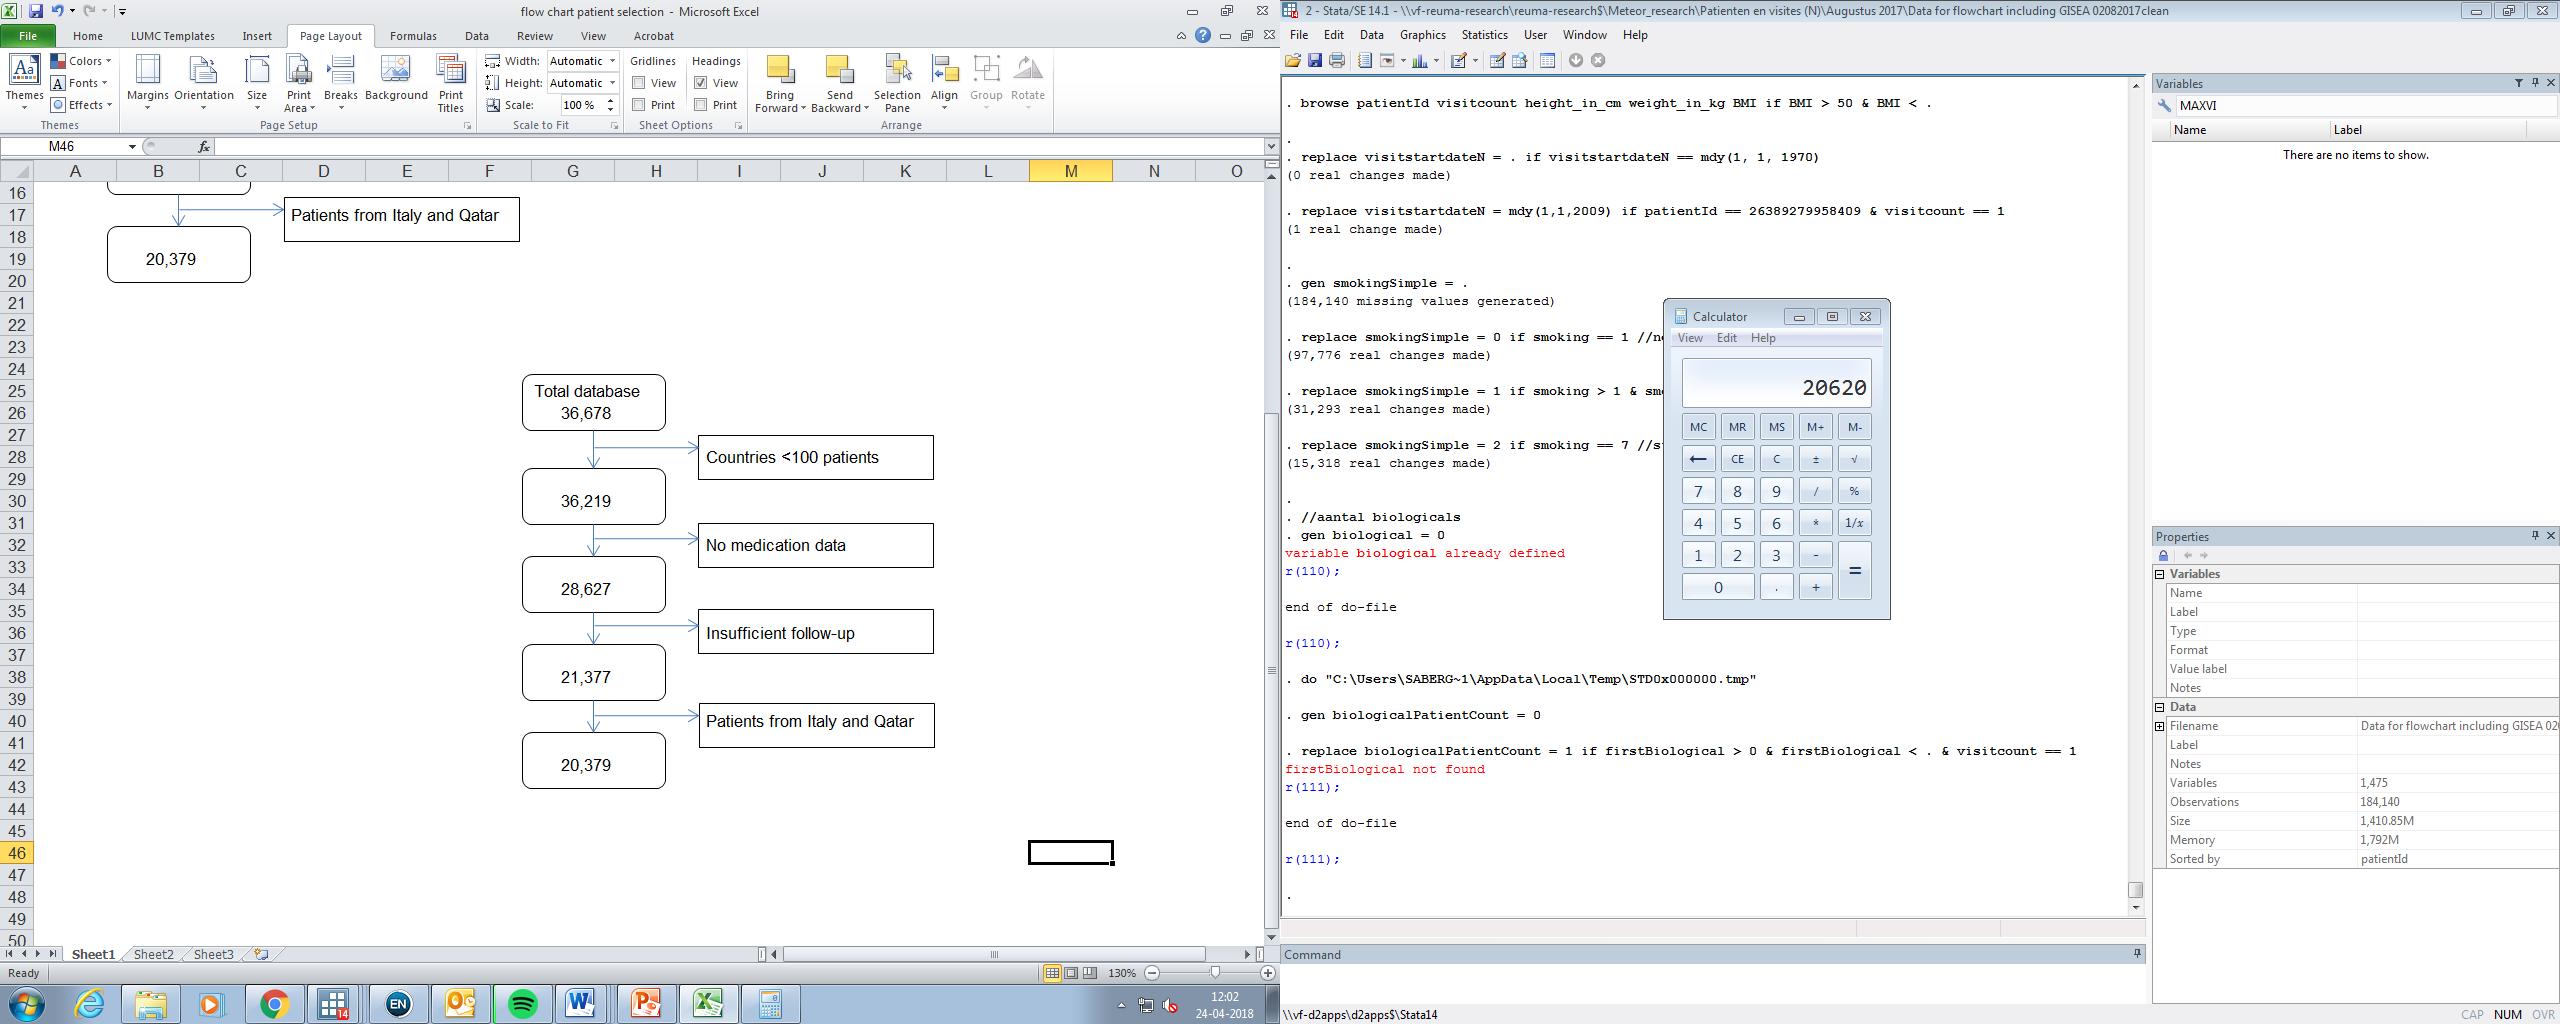


Supplementary figure 1: Flow-chart of the patient selection.

Supplement: inline-supplementary-material-1 [file inline-supplementary-material-1.docx]
